# Supplementary material for: Oral Administration of Lipopolysaccharide Enhances Insulin Signaling-Related Factors in the KK/Ay Mouse Model of Type 2 Diabetes Mellitus
Source: MDPI journal article supplement (doi:10.3390/ijms24054619), 2023-02-27
Supplement: s1 [file s1]

Oral Administration of Lipopolysaccharide Enhances Insulin Signaling-Related Factors in the KK/Ay Mouse Model of Type 2 Diabetes Mellitus

Supplementary Figure S1

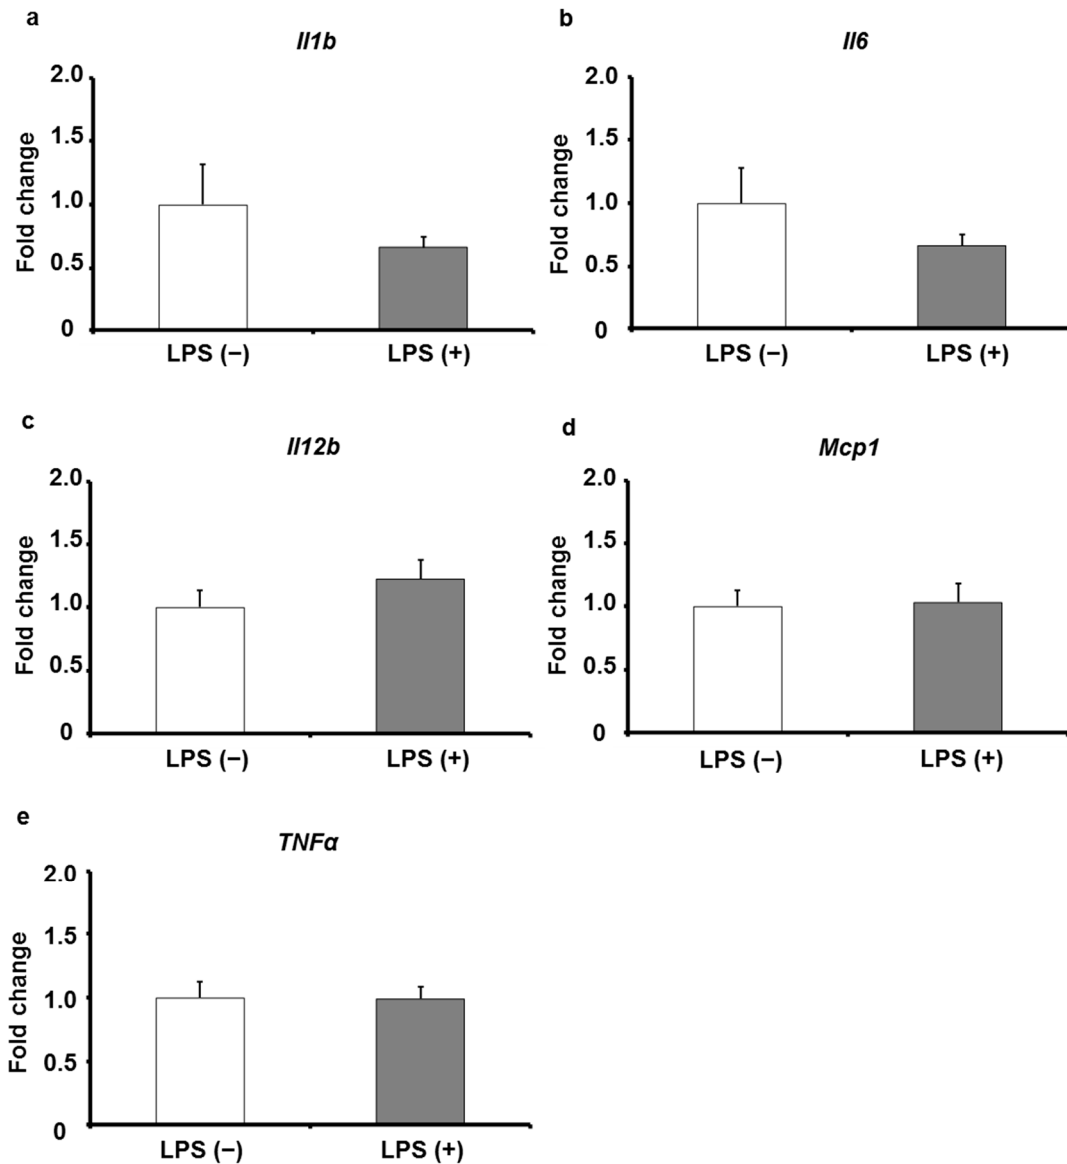

**Supplementary Figure S1.** Effects of orally administered LPS on cytokine expression in adipose tissues of KK/Ay mice. The relative mRNA expression levels of (a-e) Interleukin 1 beta (*Il1b*), Interleukin 6 (*Il6*), Interleukin 12 beta (*Il12b*), Monocyte chemoattractant protein-1 (*Mcp1*), and Tumor necrosis factor- $\alpha$  (*TNFα*) were measured by qRT-PCR ( $n = 8$ ). Values are presented as the mean  $\pm$  SE. \* $p < 0.05$  vs. LPS (-) group.

Oral Administration of Lipopolysaccharide Enhances Insulin Signaling-Related Factors in the KK/Ay Mouse Model of Type 2 Diabetes Mellitus

Supplementary Figure S2

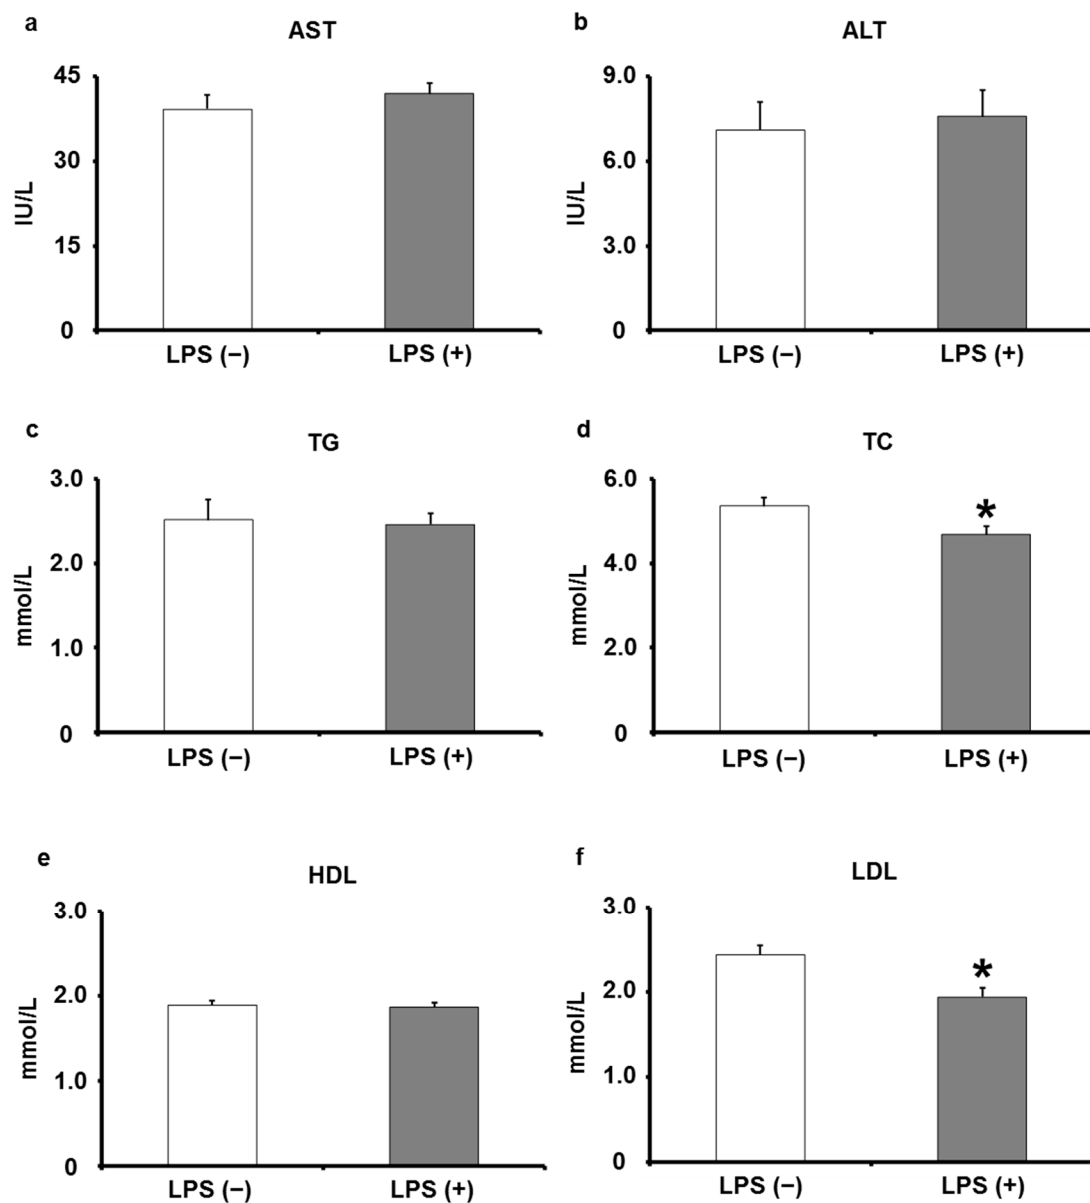

**Supplementary Figure S2.** Effects of orally administered LPS on biochemical parameters in KK/Ay mice. (a-f) Aspartate transferase (AST), alanine transaminase (ALT), triglycerides (TG), total cholesterol (TC), high-density lipoprotein (HDL), and low-density lipoprotein (LDL) levels were measured using commercial kits ( $n = 8$ ). Values are presented as the mean  $\pm$  SE. \* $p < 0.05$  vs. LPS (-) mice.
